# Supplementary material for: Spacer length, label moiety interchange and probe pair orientation in a homogeneous solid-phase hybridization assay utilizing lanthanide chelate complementation
Source: Royal Society of Chemistry journal article supplement (doi:10.1039/c4ay00466c), 2014-01-01
Supplement: c4ay00466c1.pdf [file c4ay00466c1.pdf]

ELECTRONIC SUPPLEMENTARY INFORMATION

Spacer Length, Label Moiety Interchange and Probe Pair Orientation in a Homogeneous Solid-Phase Hybridization Assay Utilizing Lanthanide Chelate Complementation

*Susanne Lahdenperä\**, *Julius Manninen<sup>1</sup>*, *Laura Joki*, *Ulla Karhunen*, and *Tero Soukka*

Department of Biotechnology, University of Turku, Tykistökatu 6 A 6<sup>th</sup> floor, FI-20520 Turku

\* Corresponding author: Department of Biotechnology, University of Turku, Tykistökatu 6 A 6<sup>th</sup> floor, FI-20520 Turku, Finland. E-mail: [susanne.lahdenpera@utu.fi](mailto:susanne.lahdenpera@utu.fi). Tel.: +358 2 333 8063.

<sup>1</sup> Present address. VTT, Itäinen Pitkätie 4 C, FI-20520 Turku, Finland.

A table of contents:

**ESI 1** The effect of the first incubation in hybridization on luminescence.

**ESI 2** The effect of NaCl concentration in hybridization buffer.

**ESI 3** The effect of probe pair orientation and label moiety interchange on luminescence.

**ESI 4** Luminescence signal line profiles across the peak top with different spotting concentrations.

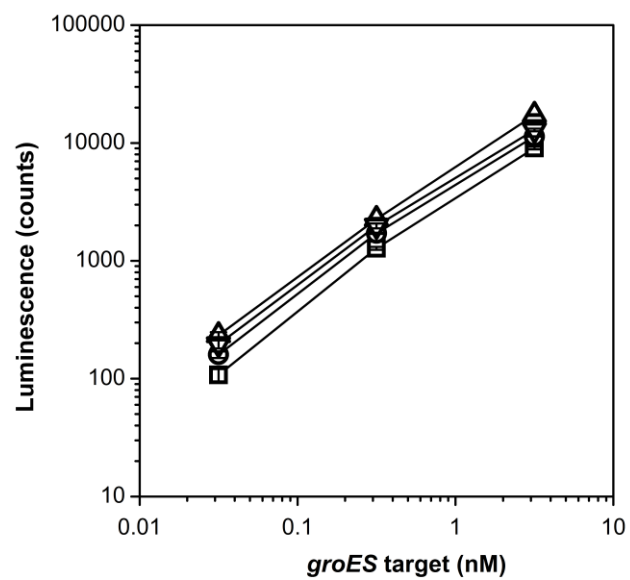

**ESI 1** The effect of the first incubation in hybridization on luminescence signals. Four alternatives for the first incubation were tested; no preincubation (squares), 20 min incubation at RT (circles), 50 °C (up triangles), and 60 °C (down triangles). Error bars indicate the standard deviation (n = 3).

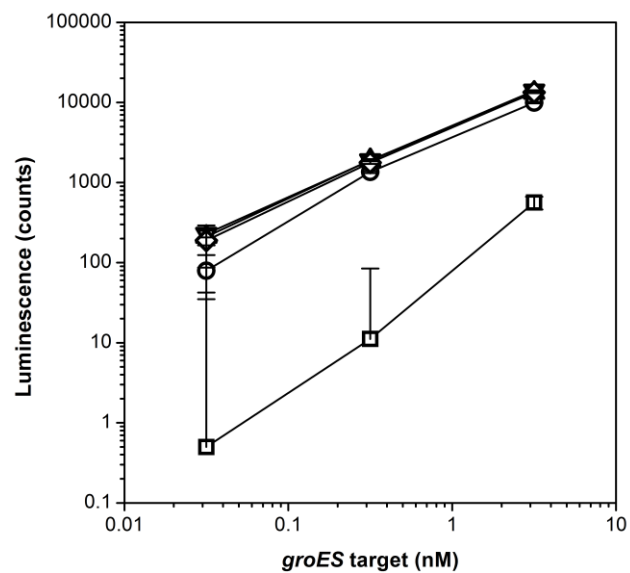

**ESI 2** The effect of NaCl concentration in hybridization buffer. The luminescence signals with five hybridization buffer NaCl concentrations; 0 mM (squares), 150 mM (circles), 300 mM (up triangles), 600 mM (down triangles), 900 mM (diamonds). Error bars indicate the standard deviation ( $n = 3$ ).

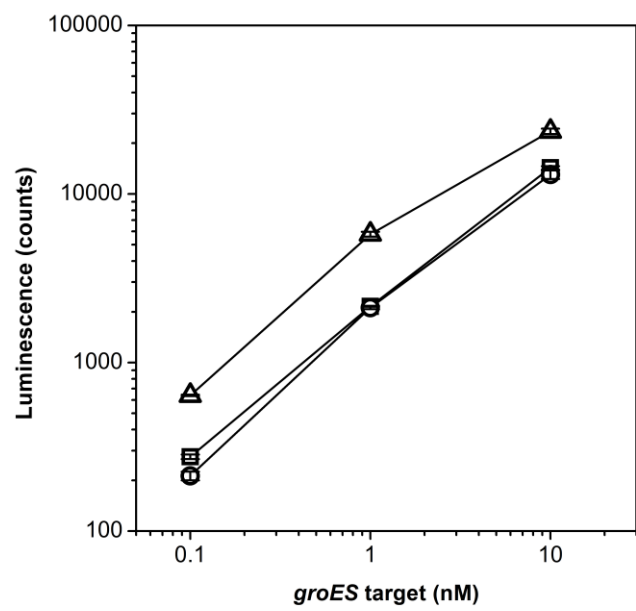

**ESI 3** The effect of probe pair orientation and label moiety interchange on luminescence. Europium ion carrier chelate was immobilized at the 3' end (squares) and antenna ligand probe was immobilized either at the 3' end (circles) or 5' end (triangles). Error bars indicate the standard deviation ( $n = 3$ ).

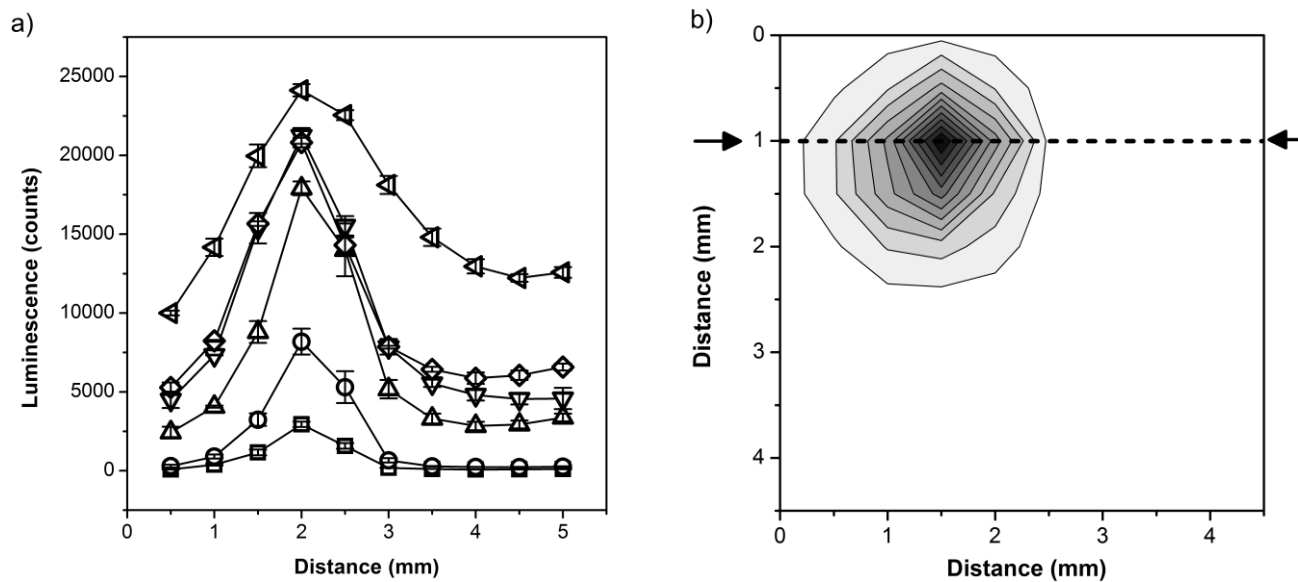

**ESI 4** Luminescence signal line profiles (a) across the peak top with different spotting concentrations (no background subtracted). (b) Line profile luminescence signals were from the horizontal measurement points in a  $10 \times 10$  raster going across the peak top shown as a dashed line and marked with arrows in the schematic luminescence image. The spotting concentrations were  $1 \mu\text{M}$  (squares),  $4 \mu\text{M}$  (circles),  $16 \mu\text{M}$  (up triangles),  $24 \mu\text{M}$  (down triangles),  $32 \mu\text{M}$  (diamonds), and  $64 \mu\text{M}$  (left triangles). The target was  $3.16 \text{ nM}$ . Error bars indicate the standard deviation ( $n = 3$ ).
